# Supplementary material
Source: PubMed Central journal article supplement (PMC1630746)
Supplement: plntphys_pp.106.083642_1.pdf [file plntphys_pp.106.083642_1.pdf]

Supplementary Table 1. *Dof* genes in the genomes of Arabidopsis, rice and *Populus*.

| Arabidopsis | Rice       | Populus   | Gene model of <i>Populus Dof</i> gene |
|-------------|------------|-----------|---------------------------------------|
| AT1G07640   | Os01g09720 | Ptr_DOF01 | estExt_fgenes1_pg_v1.C_LG_XV0095      |
| AT1G21340   | Os01g15900 | Ptr_DOF02 | fgenes1_pg.C_LG_II001614              |
| AT1G26790   | Os01g17000 | Ptr_DOF03 | eugene3.00120748                      |
| AT1G28310   | Os01g48290 | Ptr_DOF04 | eugene3.00120553                      |
| AT1G29160   | Os01g55340 | Ptr_DOF05 | grail3.0071006701                     |
| AT1G47655   | Os01g64590 | Ptr_DOF06 | grail3.0035031801                     |
| AT1G51700   | Os02g15350 | Ptr_DOF07 | eugene3.00101590                      |
| AT1G64620   | Os02g45200 | Ptr_DOF08 | estExt_Genewise1_v1.C_LG_IX4257       |
| AT1G69570   | Os02g47810 | Ptr_DOF09 | estExt_Genewise1_v1.C_LG_II0357       |
| AT2G28510   | Os02g49440 | Ptr_DOF10 | grail3.0027013501                     |
| AT2G28810   | Os03g07360 | Ptr_DOF11 | fgenes1_pg.C_LG_IV000504              |
| AT2G34140   | Os03g16850 | Ptr_DOF12 | grail3.0261000401                     |
| AT2G37590   | Os03g38870 | Ptr_DOF13 | eugene3.00190459                      |
| AT2G46590   | Os03g42200 | Ptr_DOF14 | eugene3.00150271                      |
| AT3G21270   | Os03g55610 | Ptr_DOF15 | estExt_Genewise1_v1.C_LG_III1128      |
| AT3G45610   | Os03g60630 | Ptr_DOF16 | eugene3.00050960                      |
| AT3G47500   | Os04g47990 | Ptr_DOF17 | eugene3.00130645                      |
| AT3G50410   | Os04g58190 | Ptr_DOF18 | grail3.0003061201                     |
| AT3G52440   | Os05g02150 | Ptr_DOF19 | grail3.0044005601                     |
| AT3G55370   | Os05g36900 | Ptr_DOF20 | grail3.0124004901                     |
| AT3G61850   | Os06g17410 | Ptr_DOF21 | eugene3.01240063                      |
| AT4G00940   | Os07g13260 | Ptr_DOF22 | eugene3.00070983                      |
| AT4G21030   | Os07g32510 | Ptr_DOF23 | eugene3.00060710                      |
| AT4G21040   | Os07g48570 | Ptr_DOF24 | grail3.0093009501                     |
| AT4G21050   | Os08g38220 | Ptr_DOF25 | fgenes1_pg.C_LG_I000728               |
| AT4G21080   | Os09g29960 | Ptr_DOF26 | eugene3.00040392                      |
| AT4G24060   | Os10g26620 | Ptr_DOF27 | estExt_Genewise1_v1.C_400561          |
| AT4G38000   | Os10g35300 | Ptr_DOF28 | fgenes1_pg.C_LG_VII000931             |
| AT5G02460   | Os12g38200 | Ptr_DOF29 | estExt_fgenes1_pg_v1.C_LG_VIII1519    |
| AT5G39660   | Os12g39990 | Ptr_DOF30 | eugene3.00050449                      |
| AT5G60200   |            | Ptr_DOF31 | fgenes1_pg.C_LG_XVI000552             |
| AT5G60850   |            | Ptr_DOF32 | fgenes1_pm.C_LG_VIII000324            |
| AT5G62430   |            | Ptr_DOF33 | eugene3.00150562                      |
| AT5G62940   |            | Ptr_DOF34 | grail3.0030001801                     |
| AT5G65590   |            | Ptr_DOF35 | fgenes1_pg.C_LG_I001755               |
| AT5G66940   |            | Ptr_DOF36 | grail3.0089006501                     |
|             |            | Ptr_DOF37 | fgenes1_pm.C_LG_V000172               |
|             |            | Ptr_DOF38 | estExt_fgenes1_pg_v1.C_LG_IV1063      |
|             |            | Ptr_DOF39 | estExt_fgenes1_pg_v1.C_LG_XVII0409    |
|             |            | Ptr_DOF40 | grail3.0031019801                     |
|             |            | Ptr_DOF41 | grail3.0091000801                     |
| 36*         | 30         | 41        |                                       |

\*Number of genes in a plant species.

Supplementary Table 2. Summary of motif distributions in Dof genes in the genomes of Arabidopsis (At), rice (Os) and Populus (Pt).

| Motif | At only | Pt only | At & Os only | At & Pt only | Os & Pt only | At & Os & Pt |
|-------|---------|---------|--------------|--------------|--------------|--------------|
| 17    |         |         |              |              | Yes          |              |
| 29    |         |         |              |              | Yes          |              |
| 12    |         |         |              | Yes          |              |              |
| 23    |         |         |              | Yes          |              |              |
| 28    |         |         |              | Yes          |              |              |
| 34    |         |         | Yes          |              |              |              |
| 18    |         | Yes     |              |              |              |              |
| 20    |         | Yes     |              |              |              |              |
| 25    |         | Yes     |              |              |              |              |
| 33    |         | Yes     |              |              |              |              |
| 37    |         | Yes     |              |              |              |              |
| 36    | Yes     |         |              |              |              |              |
| 1     |         |         |              |              |              | Yes          |
| 2     |         |         |              |              |              | Yes          |
| 3     |         |         |              |              |              | Yes          |
| 4     |         |         |              |              |              | Yes          |
| 5     |         |         |              |              |              | Yes          |
| 6     |         |         |              |              |              | Yes          |
| 7     |         |         |              |              |              | Yes          |
| 8     |         |         |              |              |              | Yes          |
| 9     |         |         |              |              |              | Yes          |
| 10    |         |         |              |              |              | Yes          |
| 11    |         |         |              |              |              | Yes          |
| 13    |         |         |              |              |              | Yes          |
| 14    |         |         |              |              |              | Yes          |
| 15    |         |         |              |              |              | Yes          |
| 16    |         |         |              |              |              | Yes          |
| 19    |         |         |              |              |              | Yes          |
| 21    |         |         |              |              |              | Yes          |
| 22    |         |         |              |              |              | Yes          |
| 24    |         |         |              |              |              | Yes          |
| 26    |         |         |              |              |              | Yes          |
| 27    |         |         |              |              |              | Yes          |
| 30    |         |         |              |              |              | Yes          |
| 31    |         |         |              |              |              | Yes          |
| 32    |         |         |              |              |              | Yes          |
| 35    |         |         |              |              |              | Yes          |
| 38    |         |         |              |              |              | Yes          |
| 39    |         |         |              |              |              | Yes          |
| 40    |         |         |              |              |              | Yes          |
| 41    |         |         |              |              |              | Yes          |
| Total | 1       | 5       | 1            | 3            | 2            | 29           |

Supplementary Table 3. Primers for RT-PCR analysis of poplar Dof genes.

| Gene      | Forward (5' - 3')        | Reverse (5' - 3')        |
|-----------|--------------------------|--------------------------|
| Ptr_DOF02 | catcaaatacatcggaaggcct   | cttcgacggagctgcagatg     |
| Ptr_DOF06 | tggcatctaattcatgtggaagg  | accttgactatcctgcatagct   |
| Ptr_DOF03 | atgggtcttacttactgcaa     | gctaaccctgatgatgactcgt   |
| Ptr_DOF33 | ttcactccaagtttgcgatgga   | gccactatttccatcaaggacat  |
| Ptr_DOF15 | atggatactgctcagtggcca    | agctgaaagttgggatgtgga    |
| Ptr_DOF25 | atggatactgctcagtggcca    | tcttgatgaactggcatggga    |
| Ptr_DOF28 | ttcaagaactcttaggaggtgc   | agggttttgggtggctcttagc   |
| Ptr_DOF30 | ttcaagaactcttaggaggtgc   | ttgtgccagattttcaacagagg  |
| Ptr_DOF04 | gacaccactcaattggaggag    | gattatgttgacatgatgctcg   |
| Ptr_DOF14 | gcaagacaccactcaattgttg   | ccaatctccgagaaaatcccacag |
| Ptr_DOF08 | tagatctctccagctggcagcage | catttgaattccatgccagcct   |
| Ptr_DOF35 | atttagatctcccaactggca    | gtcagtctgtccactagcaccac  |
| Ptr_DOF38 | tgttgagccaaaagaccggct    | agtttggccagagctcgaggagg  |
| Ptr_DOF39 | atgtcggagccaaaagaccagg   | ggagttgctaggtttgagcaagtt |
| Ptr_DOF22 | gccggcagaattatcaagcagcga | cccattaagagccaagaaccagc  |
| Ptr_DOF37 | tgccaacagagttatcaagcagtg | gccatgaccacctaccagcac    |
| Ptr_DOF12 | cggtctatctagatccaccaa    | gctgttgcaccaactgaaggcag  |
| Ptr_DOF29 | attccagcctatctaggttcacg  | atcggtagctgtggtggtgga    |
| Ptr_DOF24 | tggggttgagttctaagcagg    | gttgctgagcttgaattggctg   |
| Ptr_DOF41 | tggggttgagttctaagcagg    | ttggttcaaagttgttgcag     |
| Ptr_DOF01 | cttctactcagtggccacagggga | ccagaactcttgagaagctcc    |
| Ptr_DOF40 | tggatactgctactcagtgggca  | ctgaaccaccaccaactgga     |
| Ptr_DOF07 | tttggcgaatggtttggga      | agtaggctggatgaagatgctgc  |
| Ptr_DOF32 | atgtcagatttggcgataaagc   | ctggaggctcttctaagcagggt  |
